# Supplementary material for: Electrostatically-induced trajectory switching system on a multi-inlet-multi-outlet superhydrophobic droplet guiding track
Source: Royal Society of Chemistry journal article supplement (doi:10.1039/c4ra13014f), 2014-12-08
Supplement: c4ra13014f1.pdf [file c4ra13014f1.pdf]

Electronic Supplementary Information

**Electrostatic-Induced Trajectory Switching System on a Multi-Inlet-Multi-Outlet Superhydrophobic Droplet Guiding Track**

*Soonil Lee, Seulah Lee, Dayeong Kim, Jungmok Seo, Chandreswar Mahata, Hyunseok Hwang, Youngcheol Chae and Taeyoon Lee\**

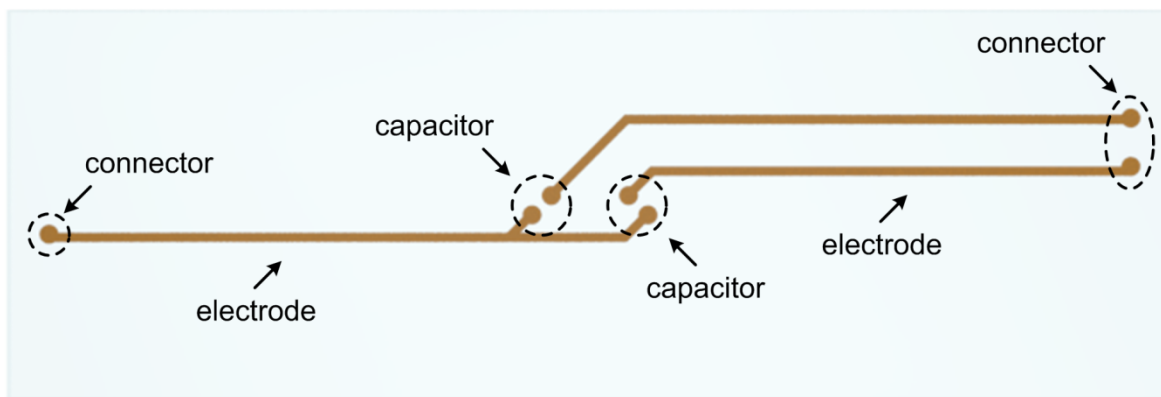

**Figure S1.** Schematic illustration of the circuit patterns on the glass slide, which contains capacitors, electrodes, and connectors.

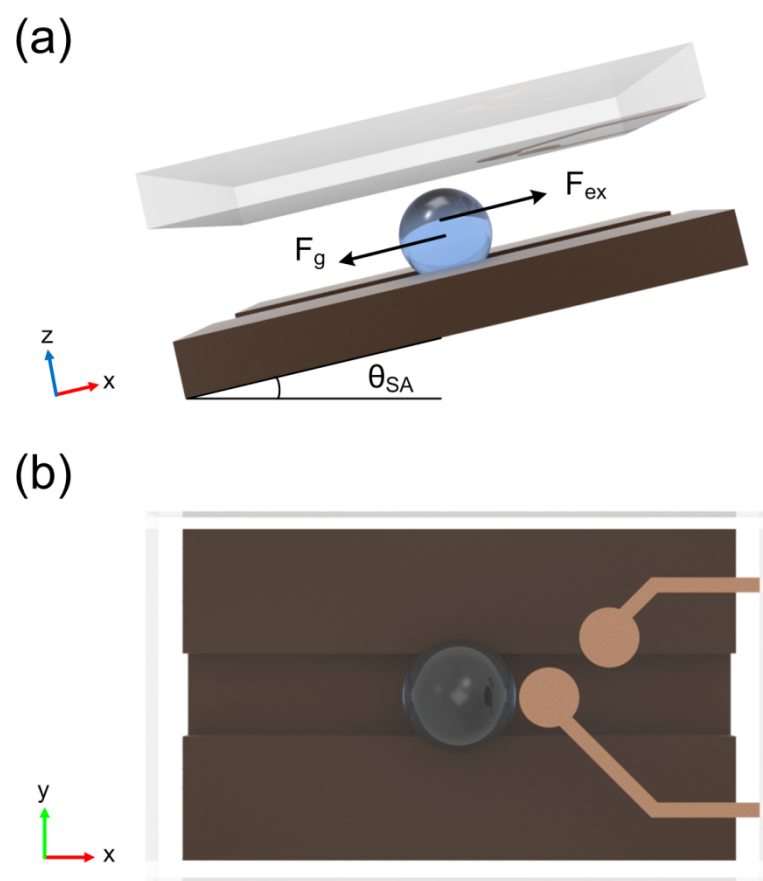

**Fig. S2** Schematic illustrations of (a) cross views and (b) top views of the measurement system, which consists of a line-patterned PFDT Ag/Cu guiding track and a one capacitor-patterned slide glass for analyzing  $F_{ex}$  and  $F_g$  exerted on a water droplet.
